# Supplementary material for: Changes Induced by Aging and Long-Term Exercise and/or DHA Supplementation in Muscle of Obese Female Mice
Source: MDPI journal article supplement (doi:10.3390/nu14204240), 2022-10-12
Supplement: s1 [file s1]

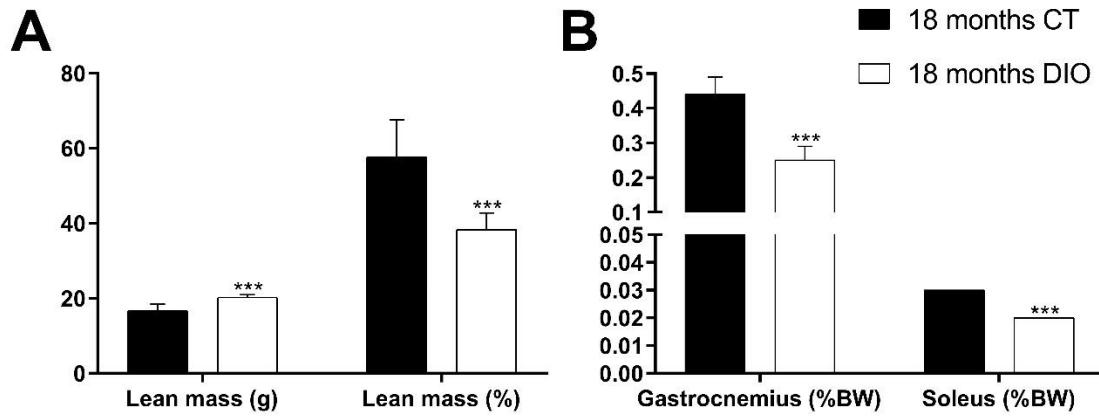

**Figure S1.** Effects of a long-term obesogenic diet on whole-body lean mass (**A**), and on gastrocnemius and soleus muscle relative mass (**B**), in aged (18-month-old) C57BL/6J female mice. Data presented as mean (SD);  $n = 9-10$ . \*\*\*  $p < 0.001$  vs. 18 months control (CT).

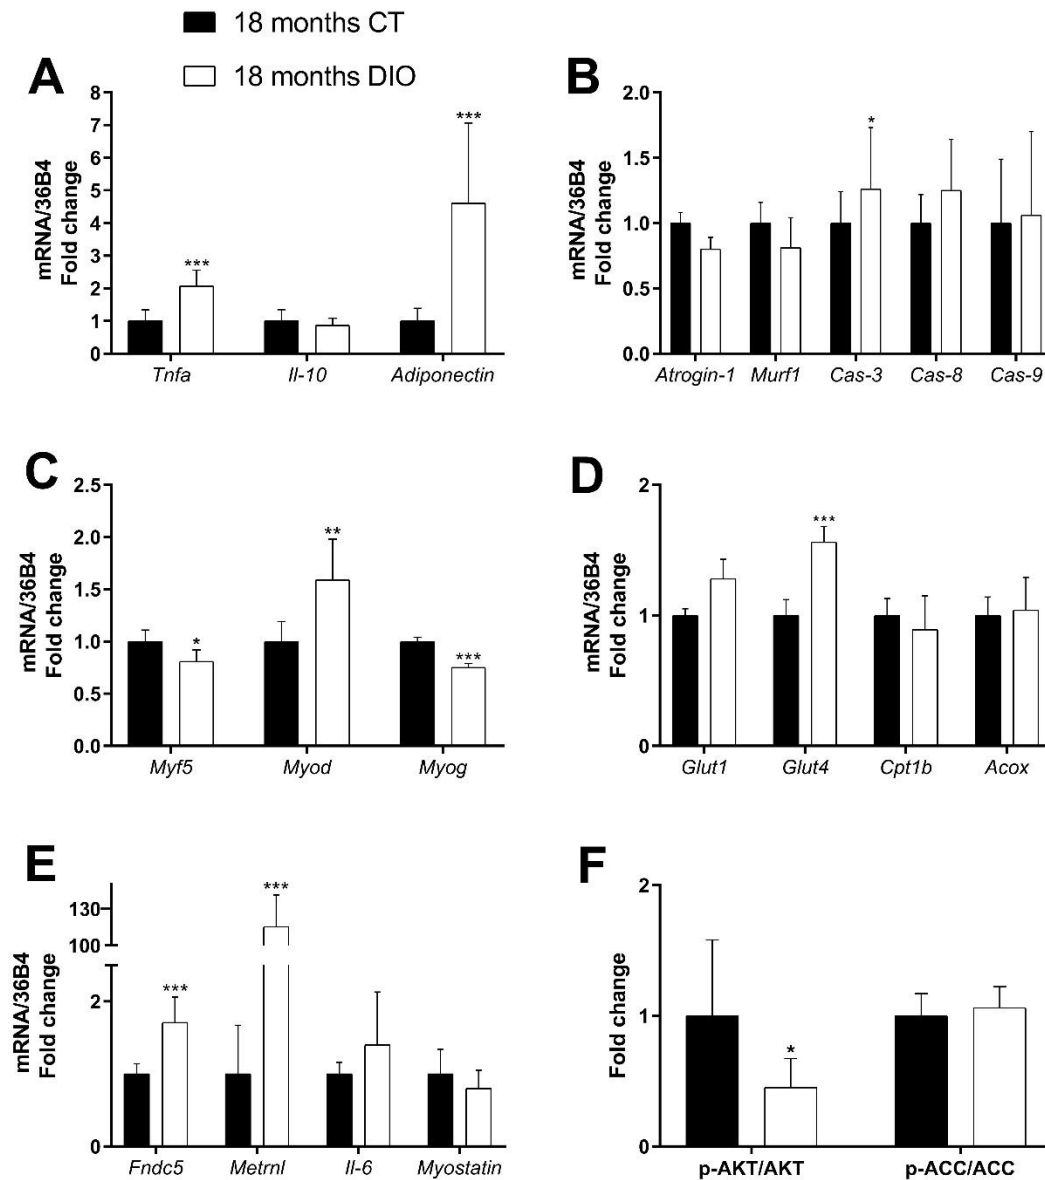

**Figure S2.** Effects of a long-term obesogenic diet on the mRNA expression of genes related to inflammation (A), muscle damage (B), muscle regeneration (C), glucose uptake and fatty acid oxidation (D), and myokine expression (E), and on phosphorylated AKT/total AKT and phosphorylated ACC/ total ACC ratios (F), in the gastrocnemius muscle of aged (18-month-old) C57BL/6J female mice. Data presented as mean (SD);  $n = 3-10$ . \*  $p < 0.05$ , \*\*  $p < 0.01$ , \*\*\*  $p < 0.001$  vs. 18 months control diet (CT).
